# Supplementary material for: Rhizosphere microbial community assembly and association networks strongly differ based on vegetation type at a local environment scale
Source: PubMed Central journal article supplement (PMC10043216; doi:10.3389/fmicb.2023.1129471), 2023-03-14

**Table S1.** Sequences of the primers for bacteria, fungi, and arbuscular mycorrhizal fungi.

|   | N                     | S                     |
|---|-----------------------|-----------------------|
| 1 | Ligustrum lucidum     | Ligustrum lucidum     |
| 2 | Forsythia viridissima | Forsythia viridissima |
| 3 | Oxalis corniculata    | Oxalis corniculata    |
| 4 | Veronica persica      | Veronica persica      |
| 5 | Bischofia polycarpa   | Eriobotrya japonica   |
| 6 | Ginkgo biloba         | Pinus massoniana      |
| 7 | Cercis chinensis      | Lonicera maackii      |
| 8 | Punica granatum L     | Euonymus japonicus    |
| 9 | Solanum nigrum        | Ophiogon japonicus.   |

**Table S2.** Sequences of the primers for bacteria, fungi, and arbuscular mycorrhizal fungi.

| <b>Soil microbes</b> | <b>Primer code</b> | <b>Primer sequence</b>     |
|----------------------|--------------------|----------------------------|
| <b>Bacteria</b>      | <b>338F</b>        | 5'-ACTCCTACGGGAGGCAGCA-3'  |
|                      | <b>806R</b>        | 5'-GGACTACHVGGGTWTCTAAT-3' |
| <b>Fungi</b>         | <b>ITS3F</b>       | 5'-GCATCGATGAAGAACGCAGC-3' |
|                      | <b>ITS4R</b>       | 5'-TCCTCCGCTTATTGATATGC-3' |

**Table S3.** GenBank number for plastome sequences used in the present study.

| <b>Species</b>               | <b>GenBank number</b> |
|------------------------------|-----------------------|
| <i>Oxalis corniculata</i>    | NC051971              |
| <i>Bischofia polycarpa</i>   | MZ826267              |
| <i>Euonymus japonicus</i>    | MZ567073              |
| <i>Cercis chinensis</i>      | MZ128523              |
| <i>Eriobotrya japonica</i>   | NC034639              |
| <i>Punica granatum</i>       | MT600023              |
| <i>Forsythia viridissima</i> | MW856917              |
| <i>Ligustrum lucidum</i>     | MH394207              |
| <i>Veronica persica</i>      | NC031344              |
| <i>Solanum nigrum</i>        | KM489055              |
| <i>Lonicera maackii</i>      | MN256451              |
| <i>Ophiopogon japonicus</i>  | MK952744              |
| <i>Ginkgo biloba</i>         | MN443423              |
| <i>Pinus massoniana</i>      | MF564195              |

**Table S4.** Significance of the relative abundance of dominant bacteria phyla in all soils. Values in the same row with different alphabetic superscripts (a, b, c) are significantly different between the four groups.

|                         | <b>Type</b>       |                    |                    |                   |
|-------------------------|-------------------|--------------------|--------------------|-------------------|
|                         | <b>Herbage</b>    | <b>Shrub</b>       | <b>Arbor</b>       | <b>Soil</b>       |
| <b>Proteobacteria</b>   | 0.30 <sup>a</sup> | 0.27 <sup>a</sup>  | 0.30 <sup>a</sup>  | 0.26 <sup>a</sup> |
| <b>Actinobacteria</b>   | 0.19 <sup>a</sup> | 0.16 <sup>ab</sup> | 0.14 <sup>b</sup>  | 0.22 <sup>a</sup> |
| <b>Cyanobacteria</b>    | 0.07 <sup>b</sup> | 0.18 <sup>ab</sup> | 0.18 <sup>a</sup>  | 0.02 <sup>c</sup> |
| <b>Bacteroidetes</b>    | 0.15 <sup>a</sup> | 0.13 <sup>ab</sup> | 0.12 <sup>b</sup>  | 0.07 <sup>c</sup> |
| <b>Chloroflexi</b>      | 0.11 <sup>b</sup> | 0.08 <sup>c</sup>  | 0.09 <sup>bc</sup> | 0.15 <sup>a</sup> |
| <b>Acidobacteria</b>    | 0.06 <sup>b</sup> | 0.06 <sup>ab</sup> | 0.05 <sup>b</sup>  | 0.08 <sup>a</sup> |
| <b>Patescibacteria</b>  | 0.04 <sup>a</sup> | 0.03 <sup>a</sup>  | 0.03 <sup>a</sup>  | 0.02 <sup>a</sup> |
| <b>Gemmatimonadetes</b> | 0.02 <sup>b</sup> | 0.02 <sup>b</sup>  | 0.02 <sup>b</sup>  | 0.07 <sup>a</sup> |
| <b>Planctomycetes</b>   | 0.01 <sup>b</sup> | 0.01 <sup>b</sup>  | 0.01 <sup>b</sup>  | 0.02 <sup>a</sup> |
| <b>Others</b>           | 0.04 <sup>a</sup> | 0.03 <sup>b</sup>  | 0.03 <sup>b</sup>  | 0.05 <sup>a</sup> |
| <b>Bacteria_ Others</b> | 0.02 <sup>c</sup> | 0.02 <sup>bc</sup> | 0.03 <sup>b</sup>  | 0.05 <sup>a</sup> |

**Table S5.** Relative abundances of dominant fungal class in all soils. Values in the same row with different alphabetic superscripts (a, b, c) are significantly different between the four groups.

|                           | Type               |                    |                    |                    |
|---------------------------|--------------------|--------------------|--------------------|--------------------|
|                           | Herbage            | Shrub              | Arbor              | Soil               |
| <b>Sordariomycetes</b>    | 0.21 <sup>ab</sup> | 0.22 <sup>ab</sup> | 0.17 <sup>b</sup>  | 0.28 <sup>a</sup>  |
| <b>Dothideomycetes</b>    | 0.26 <sup>a</sup>  | 0.1 <sup>b</sup>   | 0.09 <sup>b</sup>  | 0.07 <sup>b</sup>  |
| <b>Fungi_others1</b>      | 0.11 <sup>b</sup>  | 0.15 <sup>a</sup>  | 0.14 <sup>ab</sup> | 0.11 <sup>ab</sup> |
| <b>Agaricomycetes</b>     | 0.13 <sup>a</sup>  | 0.15 <sup>a</sup>  | 0.08 <sup>a</sup>  | 0.07 <sup>a</sup>  |
| <b>Leotiomycetes</b>      | 0.08 <sup>a</sup>  | 0.04 <sup>ab</sup> | 0.11 <sup>a</sup>  | 0.02 <sup>b</sup>  |
| <b>Fungi_others2</b>      | 0.03 <sup>b</sup>  | 0.09 <sup>a</sup>  | 0.08 <sup>a</sup>  | 0.09 <sup>a</sup>  |
| <b>Pezizomycetes</b>      | 0.02 <sup>b</sup>  | 0.02 <sup>ab</sup> | 0.11 <sup>a</sup>  | 0.15 <sup>a</sup>  |
| <b>Eurotiomycetes</b>     | 0.04 <sup>a</sup>  | 0.06 <sup>a</sup>  | 0.05 <sup>a</sup>  | 0.06 <sup>a</sup>  |
| <b>Ascomycota_others</b>  | 0.05 <sup>a</sup>  | 0.05 <sup>ab</sup> | 0.02 <sup>b</sup>  | 0.03 <sup>ab</sup> |
| <b>Mortierellomycetes</b> | 0.01 <sup>c</sup>  | 0.03 <sup>ab</sup> | 0.03 <sup>b</sup>  | 0.09 <sup>a</sup>  |
| <b>Others</b>             | 0.05 <sup>b</sup>  | 0.08 <sup>ab</sup> | 0.12 <sup>a</sup>  | 0.04 <sup>b</sup>  |

**Table S6.** Correlation between genetic distance or plant vegetation type and bacterial or fungal community structure determined based on the Mantel test ( $P < 0.05$ , permutation = 999). Significant values are in bold.

|                              | <b>Bacteria</b> |              | <b>Fungi</b> |              |
|------------------------------|-----------------|--------------|--------------|--------------|
|                              | <b>r</b>        | <b>p</b>     | <b>r</b>     | <b>p</b>     |
| <b>Genetic distance</b>      | 0.317           | <b>0.001</b> | 0.116        | 0.052        |
| <b>Plant vegetation type</b> | 0.091           | <b>0.002</b> | 0.151        | <b>0.001</b> |

**Table S7.** The Variance Partitioning Analysis (VPA) of the bacterial and fungal community among the samples.

|          | Location | Plant Type |
|----------|----------|------------|
| Bacteria | 0.005    | 0.011      |
| Fungi    | 0.017    | 0.034      |

**Table S8.** Multivariate Welch ANOVA ( $P < 0.05$ , permutation = 99999) among bacteria between all groups.

|                    | N.Herbage    | N.Shrub      | N.Arbor      | N. Bulk soil | S.Herbage    | S.Shrub      | S.Arbor |
|--------------------|--------------|--------------|--------------|--------------|--------------|--------------|---------|
| <b>N.Herbage</b>   |              |              |              |              |              |              |         |
| <b>N.Shrub</b>     | <b>0.001</b> |              |              |              |              |              |         |
| <b>N.Arbor</b>     | <b>0.001</b> | <b>0.001</b> |              |              |              |              |         |
| <b>N.Bulk soil</b> | <b>0.007</b> | 0.062        | <b>0.036</b> |              |              |              |         |
| <b>S.Herbage</b>   | 0.112        | <b>0.001</b> | <b>0.001</b> | <b>0.013</b> |              |              |         |
| <b>S.Shrub</b>     | <b>0.001</b> | <b>0.003</b> | <b>0.001</b> | <b>0.006</b> | <b>0.003</b> |              |         |
| <b>S.Arbor</b>     | <b>0.001</b> | <b>0.001</b> | <b>0.007</b> | <b>0.010</b> | <b>0.001</b> | 0.071        |         |
| <b>S.Bulk soil</b> | <b>0.004</b> | 0.160        | 0.113        | 0.088        | <b>0.010</b> | <b>0.027</b> | 0.067   |



**Table S9.** Multivariate Welch ANOVA ( $P < 0.05$ , permutation = 99999) among fungi between all groups.

|                     | <b>N.Herbage</b> | <b>N.Shrub</b> | <b>N.Arbor</b> | <b>N. Bulk soil</b> | <b>S.Herbage</b> | <b>S.Shrub</b> | <b>S.Arbor</b> |
|---------------------|------------------|----------------|----------------|---------------------|------------------|----------------|----------------|
| <b>N.Herbage</b>    |                  |                |                |                     |                  |                |                |
| <b>N.Shrub</b>      | <b>0.001</b>     |                |                |                     |                  |                |                |
| <b>N.Arbor</b>      | <b>0.001</b>     | <b>0.001</b>   |                |                     |                  |                |                |
| <b>N. Bulk soil</b> | <b>0.018</b>     | <b>0.035</b>   | <b>0.030</b>   |                     |                  |                |                |
| <b>S.Herbage</b>    | <b>0.037</b>     | <b>0.001</b>   | <b>0.001</b>   | <b>0.021</b>        |                  |                |                |
| <b>S.Shrub</b>      | <b>0.001</b>     | <b>0.004</b>   | <b>0.001</b>   | <b>0.011</b>        | <b>0.014</b>     |                |                |
| <b>S.Arbor</b>      | <b>0.001</b>     | <b>0.001</b>   | <b>0.001</b>   | <b>0.017</b>        | <b>0.006</b>     | 0.254          |                |
| <b>S. Bulk soil</b> | <b>0.022</b>     | <b>0.031</b>   | <b>0.030</b>   | 0.109               | <b>0.030</b>     | 0.063          | 0.125          |

**FIGURE S1.** The schematic diagram of sample collection location(a) (Sampling map was download from <https://www.henu.edu.cn/zjhd/xqsyt.htm> and was modified accordingly) and the phylogenetic tree of 14 species collected in the experiment(b).

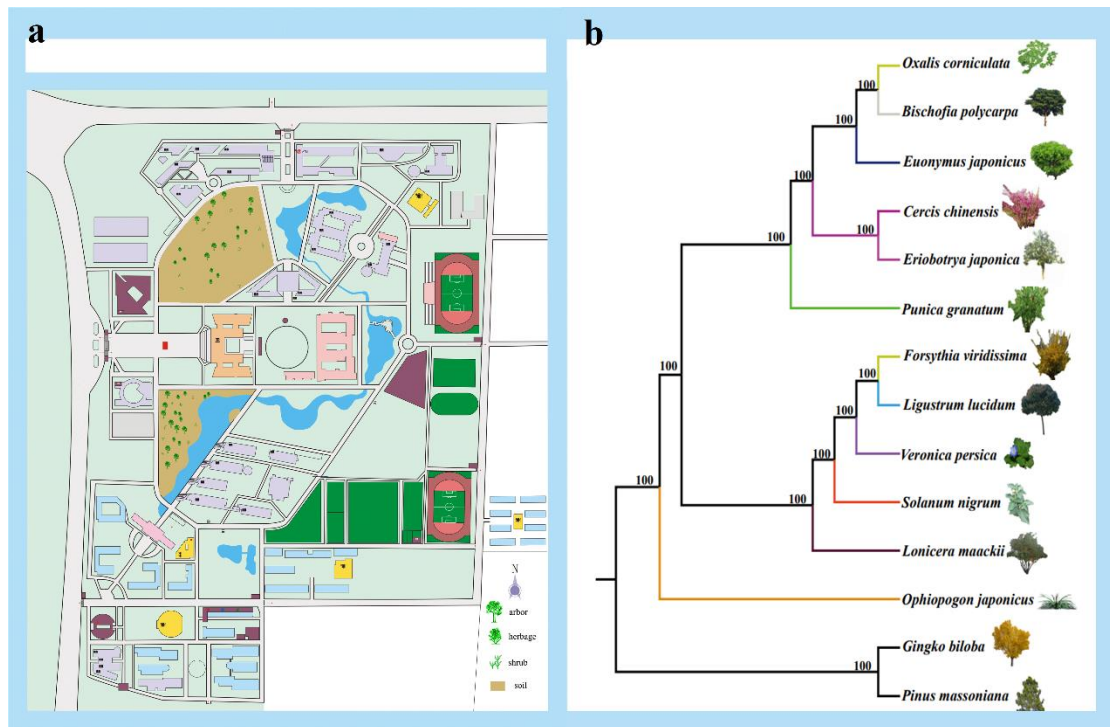

**FIGURE S2.**  $\alpha$ -Diversities of soil bacteria in the four plant types. Shannon(a), Simpson(b), Observed(c) and Chao 1(d) indices of the fungus of rhizosphere soil.

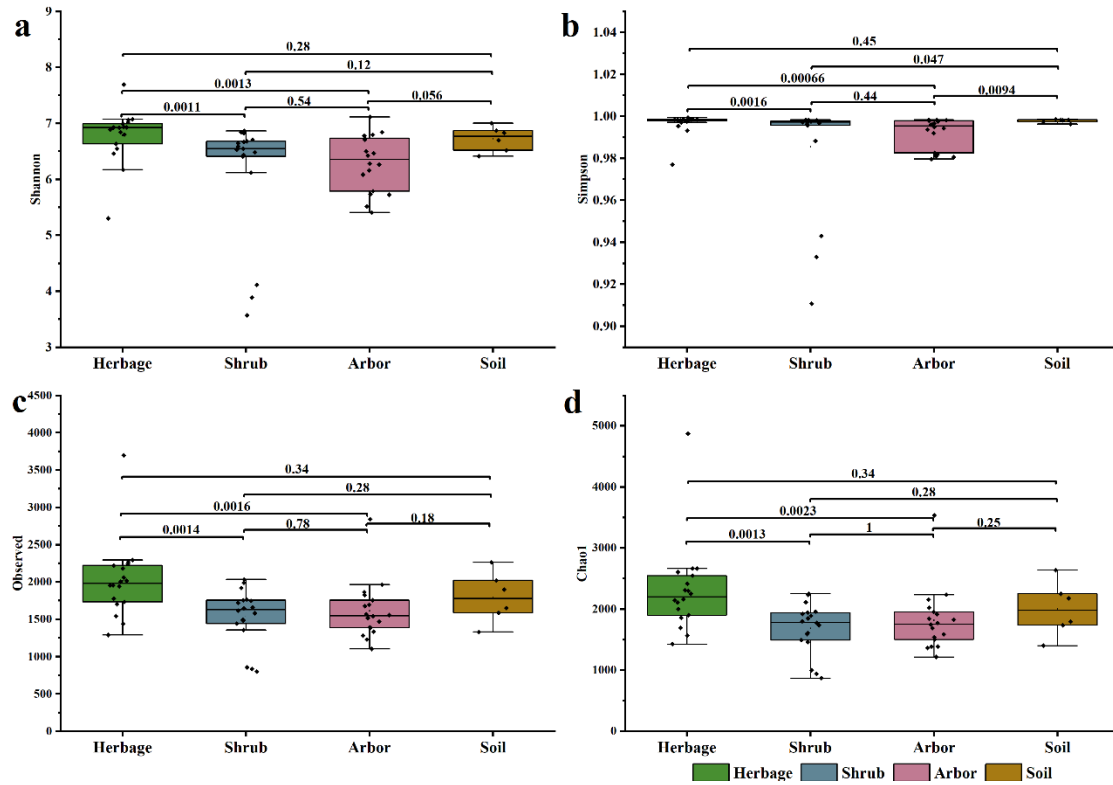

**FIGURE S3.**  $\alpha$ -Diversities of soil fungus in the four plant types. Shannon(a), Simpson(b), Observed(c) and Chao 1(d) indices of the bacteria of rhizosphere soil.

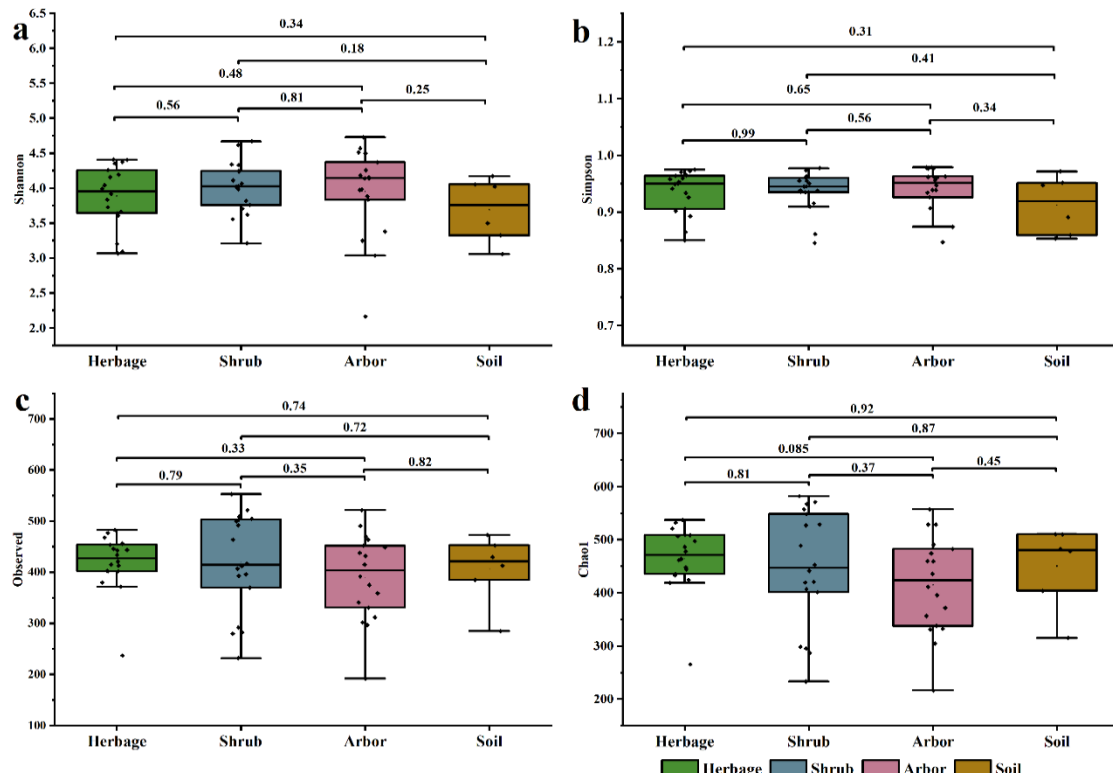

**FIGURE S4.** Principal coordinate analysis (PCoA) of the bacterial (a) and fungal (b) community among the samples based on Bray-Curtis distances.

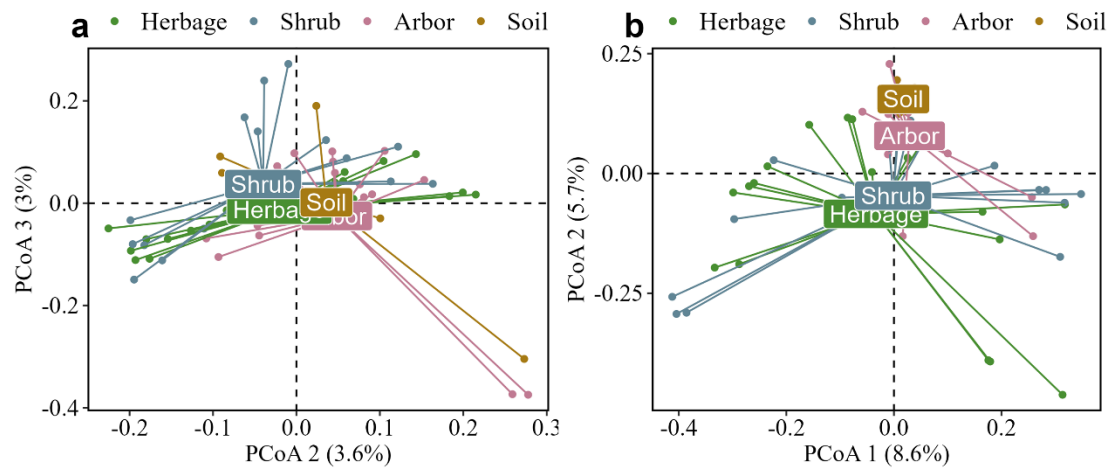

**FIGURE S5.** Principal component analysis (PCA) of the bacteria (a) fungus (b) among the samples. There was no significant grouping of fungus and bacteria in the four plant types.

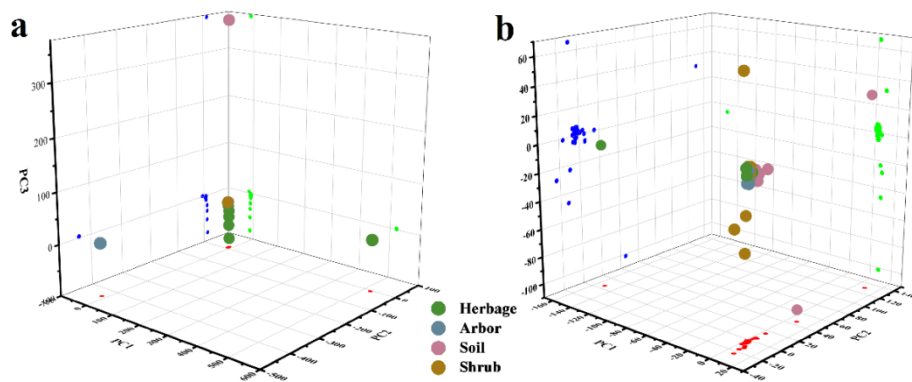

**FIGURE S6.** Principal coordinate analysis (PCoA) of the bacteria (a) fungus (b) between samples from two sampling locations.

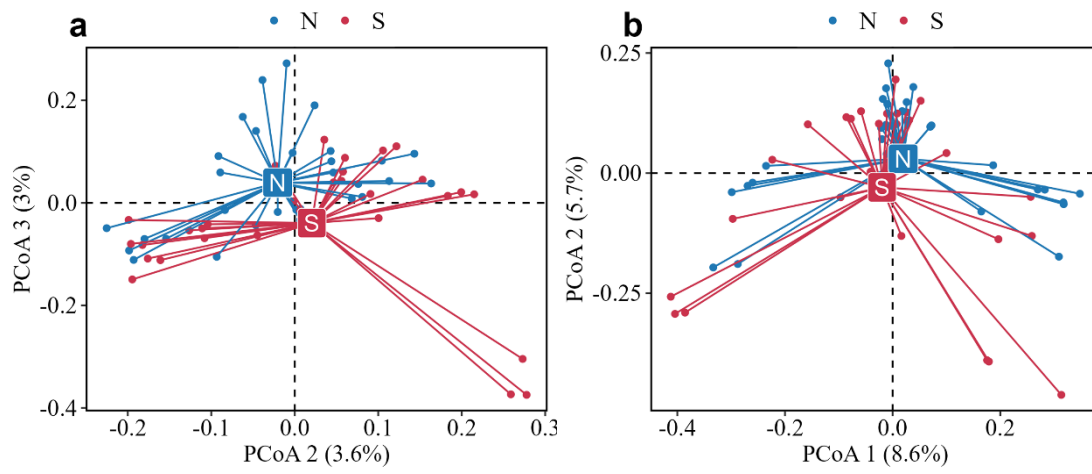

Supplement: Data_Sheet_1.pdf [file Data_Sheet_1.pdf]
